# Automatic Identification of Tinnitus Malingering Based on Overt and Covert Behavioral Responses During Psychoacoustic Testing

Christopher J. Smalt<sup>1</sup>, Jenna A. Sugai<sup>2</sup>, Elouise Koops<sup>2,3</sup>  
Kelly N. Jahn<sup>2,4</sup>, Kenneth E. Hancock<sup>2,4</sup>, Daniel B. Polley<sup>2,4</sup>

<sup>1</sup>Human Health & Performance Systems Group, MIT Lincoln Laboratory, Lexington, MA, USA

<sup>2</sup>Eaton-Peabody Laboratories, Mass Eye and Ear, Boston, MA, USA

<sup>3</sup>Department of Neuroscience, University of Groningen, Groningen, Netherlands

<sup>4</sup>Department of Otolaryngology - Head and Neck Surgery, Harvard Medical School, Boston, MA, USA

## Abstract

Tinnitus, or ringing in the ears, is a prevalent condition that imposes a substantial health and financial burden on the patient and to society. The diagnosis of tinnitus, like pain, relies on patient self-report. Subjective self-report measures can complicate the distinction between actual and fraudulent claims and obscure accurate severity assessments. In this study, we combined tablet-based self-directed hearing assessments with neural network classifiers to objectively determine tinnitus severity, and to differentiate participants with tinnitus (N=24) from a malingering cohort, who were instructed to feign an imagined tinnitus percept (N=28). We identified clear differences between the groups, both in their overt rating of tinnitus severity but also covert differences in their fingertip movement trajectories on the tablet surface as they performed the reporting assay. Using only 10 minutes of data, we achieved 81% accuracy classifying patients vs malingerers (ROC AUC=0.88) with leave-one-participant-out cross validation. Objective measurements of tinnitus will improve estimates of tinnitus prevalence and help to prioritize and direct funds for tinnitus compensation.

## 1 Introduction

Tinnitus is a prevalent auditory condition that imposes a substantial burden to the patient and to society (Maes et al., 2013; Bhatt et al., 2016). According to the US veteran benefits administration fiscal year 2020, tinnitus was the most prevalent service-connected disability among new compensation recipients. In fiscal year 2020, 10.2% of all new benefits recipients received compensation for tinnitus (149,368 claims). Tinnitus was also the most prevalent overall disability with a total of 2,327,387 claims of tinnitus that year, with hearing loss as the second most prevalent disability claimed, representing 1,343,013 claims. The economic and health impacts of tinnitus are alarming not only because of the high prevalence, but also because tinnitus claims have been consistently rising at an average annual rate of 12% since 2011. It is noteworthy that since that time, claims have been growing at nearly twice the rate of hearing loss (7%), a related condition for which there is an established diagnostic measurement via the pure tone audiogram.

Currently, the diagnosis of tinnitus, like pain, relies on subjective and self-reported measures (Basile et al., 2013). As a result, it is challenging for patients to convey the characteristics and severity of their tinnitus percept to their caregivers. Although psychoacoustic measures such as tinnitus pitch and intensity matching are often obtained to define the auditory attributes of tinnitus, there is presently no established relationship between these attributes and the actual severity of the symptom (Henry, 2016; Byun et al., 2010). Both the quality and severity of tinnitus can vary over time for an individual (Henry & Meikle, 2000; Chen et al., 2020). Test-retest reliability across patients has been shown to be as high as 0.94 on a 52-item questionnaire (Hiller et al., 1994), but much poorer across longer time spans of months (Hoare et al., 2014) reflecting the dynamic nature of tinnitus.

Developing new, more objective, tinnitus diagnostics could prove useful for assessing tinnitus severity and for distinguishing between legitimate and fraudulent cases among the large - and ever growing - tinnitus disability claims. In this context, malingering is the feigning of a medical condition for gain. Possible incentives for

37 doing so include obtaining economic compensation or to be removed from difficult circumstances, such as  
38 military service (Jerger et al., 1981). Previous work has shown mixed results in distinguishing malingerers  
39 from tinnitus patients using psychoacoustic measures (Henry, McMillan, et al., 2013; Steiger et al., 2013),  
40 partially due to the lack of reliability within a given patient with tinnitus (McMillan et al., 2014). In this  
41 study we develop a system that automatically classifies (i.e. “identifies”) tinnitus patients from malingerers  
42 through behavioral testing that establishes a relationship between the characterization of tinnitus loudness  
43 and acoustic properties and the presence of the disability.

## 44 **2 Methods**

### 45 **2.1 Populations**

46 A population of 52 participants were included for study. The tinnitus cohort (N=24) were recruited from  
47 Mass Eye and Ear, having reported tinnitus as their chief complaint, as reported in our previous publication  
48 (Chen et al., 2020). The malingering cohort consisted of 28 individuals who confirmed having no perception  
49 of tinnitus. This study was approved by the Massachusetts Eye and Ear Institutional Review Board and  
50 participants provided written informed consent to take part in the study. Participants completed several  
51 tablet-based tasks related to their hearing with calibrated headphones over a period of days to behaviorally  
52 characterize their tinnitus. Figure 1(A) schematizes the overview of the study design, where five sessions  
53 were performed over a 2 week period following a baseline clinical assessment and audiometry. After first  
54 confirming that they did not have chronic subjective tinnitus, participants in the malingering groups were  
55 instructed to perform all measures as if they heard a constant phantom sound. They were first trained on  
56 what tinnitus sounded like by reading text descriptions and listening to five sample audio files of tinnitus  
57 match sounds. Matched sounds were generated from data corresponding to actual patient matches of their  
58 tinnitus precepts (Chen et al., 2020). After confirming that they were confident in their ability to imagine  
59 a tinnitus sound, the malingering participants were instructed to complete the tests while imagining the  
60 presence of a constant tinnitus-like sound. Apart from these additional instructions and guidance for the  
61 malingering group, all procedures were matched between the two groups.

62 The average ages of the patient and malingering groups were 52.0 and 53.7, respectively, with standard  
63 deviations of 12.3 and 11.4 respectively. Hearing (i.e audiometric) thresholds were measured for both ears  
64 between 0.25 and 16 kHz. Figure 1 panels B-C shows the individual and average audiograms for the two  
65 groups, respectively. This study was approved by the Massachusetts Eye and Ear and Mass General Brigham  
66 Institutional Review Boards.

### 67 **2.2 Tinnitus characterization**

68 All participants performed three psychoacoustic tasks: a tinnitus visual analog scale (VAS) rating, the  
69 minimum masking level (MML), and the tinnitus acoustic matching, all of which used a slider-bar and  
70 touch screen to collect the participant’s response. For each of the five experimental sessions, multiple runs  
71 (i.e. repetitions) were performed for each measurement type. Each of these repetitions within a session are  
72 referred to as trials. Subjects performed all testing from home using calibrated circumaural headphones  
73 (Bose) and custom software applications developed as a Windows Store App using the Unity game engine  
74 and side-loaded onto the tablets (Microsoft Surface Pro 2).

75 Figure 1D depicts the participant view of the three slider tasks and their instructions. The VAS slider  
76 ranged from ‘not audible’ to ‘extremely loud’ (0-100). In the MML task, participants adjusted a virtual  
77 slider to control the sound level of a noise band. Their task was to identify the minimum sound level at  
78 which they no longer perceived their (imagined) tinnitus over the masking noise. Finally, participants were  
79 then asked to adjust the acoustic properties of sound delivered to one ear so as to match the sound of  
80 their real or imagined tinnitus percept. The sound was presented monaurally, to the ear where participants  
81 reported having less tinnitus, thus allowing them to compare the sound generated by the tablet software  
82 to their perceived or imagined tinnitus sound. Subjects adjusted four auditory characteristics: level (dB  
83 SL), center frequency (Hz), bandwidth (octaves), and amplitude modulation (Hz). They could adapt these  
84 characteristics with sliders on the tablet via interaction with the touchscreen, where the sound could be  
85 changed procedurally as they adjusted the sliders. The parameters used to generate the audio were sampled

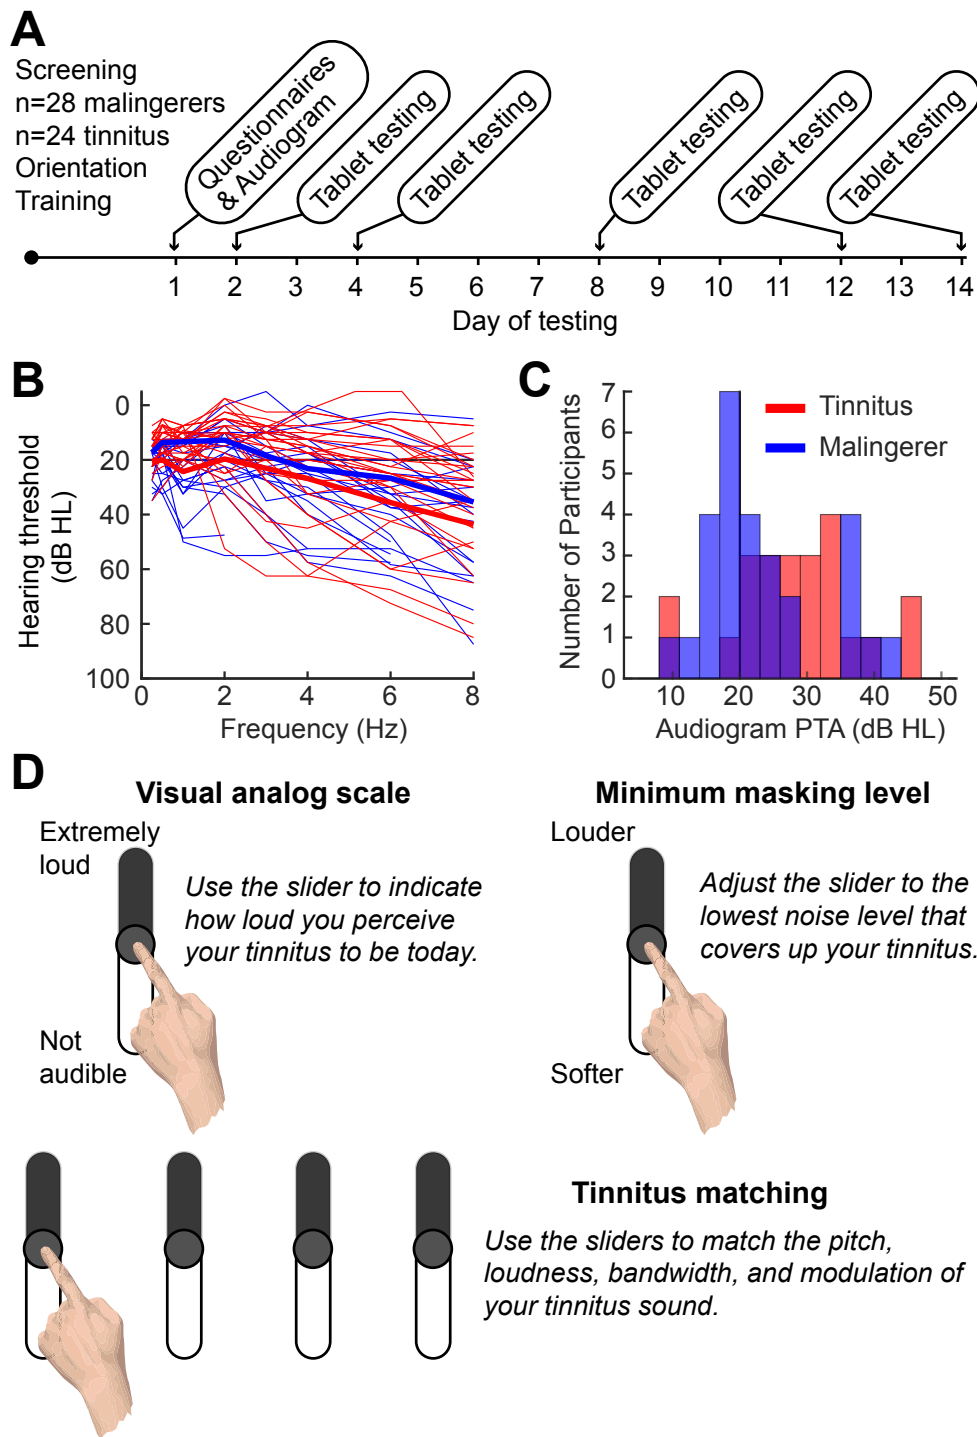

Figure 1: A-B: Audiograms for tinnitus patients (red) and malingers (blue) who were instructed to pretend they had tinnitus during the remainder of the study. C-E: Graphical User Interface to characterize tinnitus loudness (D), minimum masking level (MML) (D) and to match tinnitus (E) with visual sliders. The overall order to the study is shown in F, where tinnitus matching was done in five separate sessions across a two week period using a tablet computer.

86 and stored at approximately 5 times per second (5 Hz) from the slider values. The range of values the slider  
87 encoded became smaller over trials within a session. Thus, the same distance (i.e., the values covered, for  
88 instance, a change in level) a finger traveled on the slider in trial 1 does not necessarily correspond to the  
89 change in level in trial 10.

## 90 2.3 Feature Extraction

91 Two approaches were used to analyze the participant's interaction with the graphical touch sliders, cor-  
92 responding to *what* was measured and *how* it was answered. The first approach focused on the response  
93 outcomes, which correspond to standard psychoacoustic measures of tinnitus including the masking level,  
94 VAS and tinnitus matching. These standard measures are derived from the final value of the graphical slider  
95 on each trial of the experiment. A repeated measures ANOVA with the factors session (1-5) and group  
96 (patient, malingering) was then used to determine whether there were any differences between the reported  
97 precept of the two populations, as well as changes in test-retest reliability. Participants were modeled as a  
98 random effect. The second method focused on how participants interacted with the graphical user interface  
99 and sliders over time, not just the final value of the slider. Figure 2A-B show how the change in slider value  
100 over time can be recorded and stored as a time series.

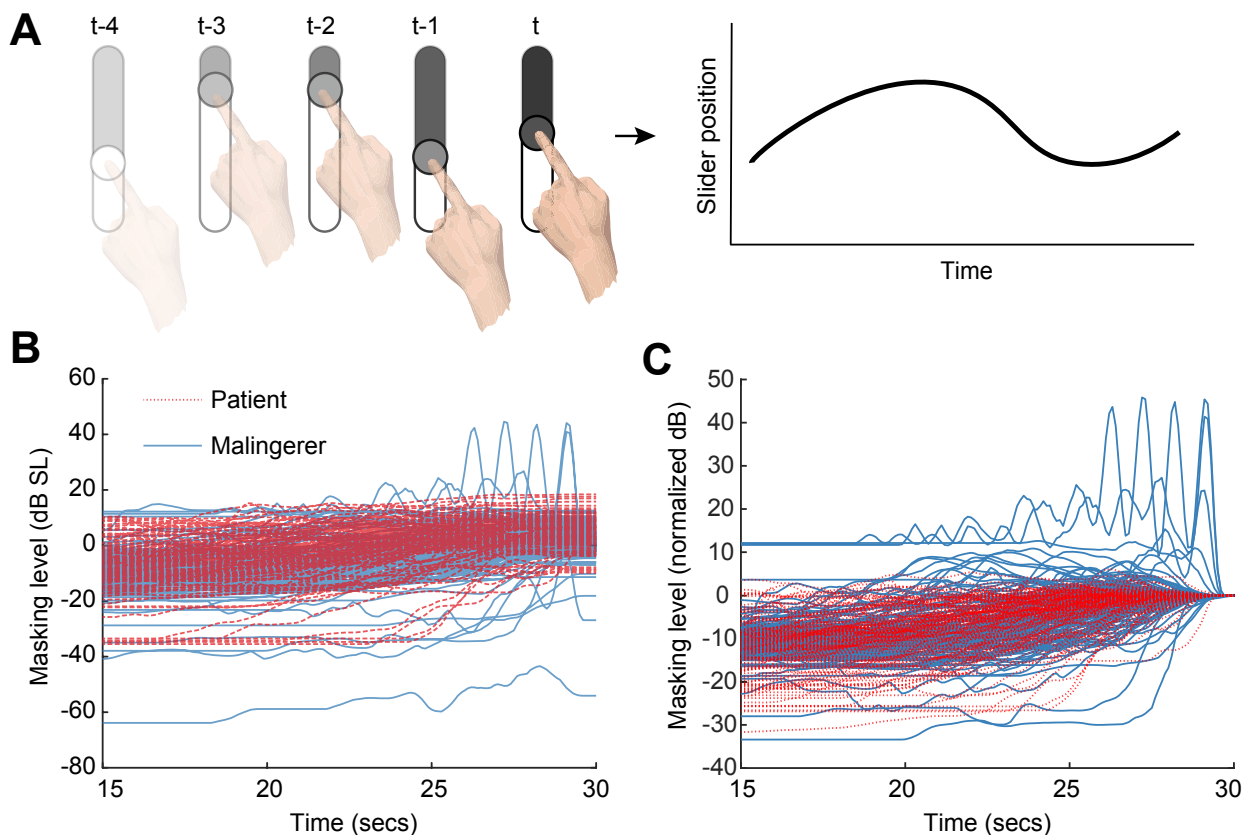

Figure 2: Minimum Masking Level (MML) slider position as a function of time for tinnitus patients and malingeringers. Only the last 15 seconds of the track were extracted for further analysis.

## 101 2.4 Machine learning

102 Classifier algorithms were constructed to distinguish between tinnitus and malingering groups. Leave-one-  
103 subject-out (LOSO) cross-validation was used to train and evaluate the model, combining runs of slider  
104 adjustment across the various tinnitus-characterization tasks within an experimental session. Classifiers

105 were evaluated in terms of classification accuracy (percent correct), and by the area under the curve (AUC)  
106 of the receiver operating characteristic (ROC) curve, which evaluates the diagnostic capability of a binary  
107 classifier (Fawcett, 2006).

108 Classification was performed with three different types of input data and corresponding classifiers. First  
109 the outcome measurements alone were used (i.e. the final slider values) as input using (multiple) logistic  
110 regression. Second, the MML slider time series was used as input to a convolutional deep neural network  
111 (DNN) to investigate latent information stored in the slider movement. Finally, summary features were  
112 derived and pooled from the time-series data of all tasks. Feature-based classifier implementation was done  
113 in Python using scikit-learn's `LogisticRegression` and `RandomForestClassifier` (Pedregosa et al., 2011)  
114 in a leave-one-participant out fashion. The random forest classifier was run with with 100 estimators and a  
115 maximum depth of 5 trees. Features derived included the slider final value, the mean and standard deviation  
116 of the slider time-series across runs as well as the maximum velocity, and cross-correlation of the time-series  
117 across runs.

118 Alternatively, a DNN was applied to the raw slider time series data derived from the tinnitus masking  
119 task that did not depend on manual feature selection. Because the time-series may be a different length for  
120 each participant and each trial, only the final 15 seconds of slider time-series for each participant was used  
121 (see Figure 2 C). This fixed duration segmentation also had the benefit of removing time spent on each trial  
122 as a latent feature (i.e. participant effort).

123 The DNN was implemented in pytorch, and used two cascaded 1D convolutional layers (18 and 9 chan-  
124 nels respectively), followed by maxpool, batchnorm, and a fully connected layer. Eighteen input channels  
125 corresponded to the 18 trials of the MML task performed in a single session. This means that there were a  
126 total of five sessions evaluated by the DNN for each participant. Dropout was used during training with a  
127 probability of 10%.

128 To separate *how* the participant interacted with the slider from *what* the final result of the slider revealed  
129 (i.e. the MML) we subtracted the mean slider final value from the time series for each participant. This  
130 process normalizes the actual selected behavioral value so that the final value is 0 dB SL on average (Figure  
131 2).

## 132 3 Results

### 133 3.1 Tinnitus Characterization

134 Patients and malingerers quantified their perceived severity and psychoacoustic qualities of their (imagined)  
135 tinnitus in several ways, including visual analog scale rating, minimum masking level (MML), and sound  
136 matching. Figure 3 illustrates the MML (A), the visual analog scale (VAS) tinnitus rating (B), as well  
137 as the sound level (C) and spectral bandwidth (D) that matches the (imagined) tinnitus sound. When  
138 compared to patients with tinnitus, malingerers reported that their tinnitus was masked at lower sound  
139 levels, was less bothersome, and had broader spectral bandwidth (i.e., less like a pure tone) (Repeated-  
140 measures ANOVA main effect for group on MML ( $F = 9.28, p = 0.004$ ), VAS rating ( $F = 31.7, p < 0.0001$ ),  
141 matching bandwidth ( $F = 7.31, p = 0.009$ ). No differences were noted in the sound level used to match  
142 the tinnitus loudness between groups ( $F = 0.005, p = 0.94$ ). No significant effect of experimental session or  
143 interaction effect was observed.

### 144 3.2 Classification based on outcome measures

145 While psychoacoustic and self-reported tinnitus measures indicate statistical differences between the tinnitus  
146 patient and malinge groups, our motivation for the study was to determine if tinnitus status could be  
147 determined objectively on the individual patient level. Figure 4 shows how accurately logistic regression  
148 models were able to classify patients from malingerers considering only the final value of each slider (the  
149 outcome variable(s)) for each task as the predictor. The MML and VAS classifiers were trained using a  
150 single outcome variable corresponding to individual sliders, while the classifier for the matching task had  
151 four corresponding to the four sliders used. Finally, the performance combining all slider outcomes is shown  
152 in red, achieving 68% Accuracy and an AUC=0.75.

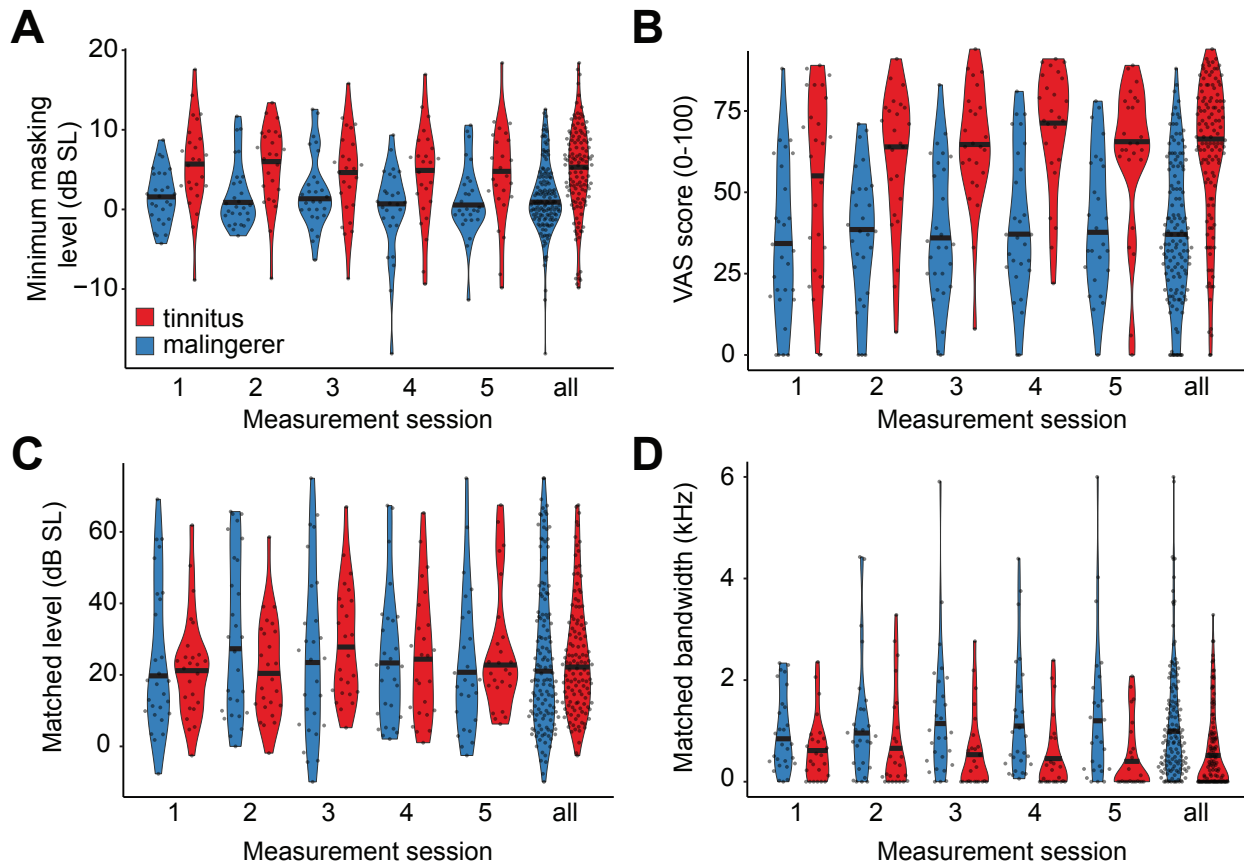

Figure 3: In our sample population, malingering participants report that their imagined tinnitus is less tonal, more easily masked, and less bothersome than patients with tinnitus. Normalized density distributions along with single participant data (filled circles) are provided for MML (A), VAS (B), loudness matching (C) and bandwidth matching (D). All estimates were repeated five times, shown individually and collapsed over all sessions.

### 153 3.3 Slider time-series

154 In addition to classifying patients from malingerers based on the final outcome variables (the final placement  
 155 of each individual slider), we also created a model to classify the two groups based on engagement of the  
 156 participant with the sliders during the entirety of the MML task. Figure 5A compares the approach using only  
 157 the psychoacoustic outcome variable (logistic regression, green) with two alternative classification approaches  
 158 using the additional features derived from the slider time-series. The feature-based random forest (orange)  
 159 and DNN (blue) utilize the raw slider time series shown in Figure 2C. The respective performances were  
 160  $AUC=0.67$ ,  $0.77$ , and  $0.84$  with corresponding accuracies of 49%, 65%, and 77%. The Random Forest, which  
 161 incorporates features such as participant variability within a session, outperforms the classifier relying on  
 162 the outcome variable alone (logistic regression). The DNN outperforms both with the highest performance,  
 163 likely due to the access to raw data and potential latent features in the data.

164 A close inspection of the finger path trajectories on the MML task revealed that tinnitus participants  
 165 interfaced with the virtual slider differently than malingering participants. As illustrated in (Fig. 2), tinnitus  
 166 participants gradually increased the making level to converge on their MML, whereas malingering participants  
 167 made larger, more erratic adjustments before abruptly stopping on their MML. To analyze the degree that  
 168 the DNN relied on the slider time-series versus the outcome variable (MML), we subtracted the MML for each  
 169 subject from each time-series (Figure 2D). This normalization resulted in the respective ROC:  $AUC=0.79$ ,  
 170  $0.72$ , and  $0.31$ , and accuracies of 77.4%, 65%, 49% for the DNN, random forest, and logistic regression,  
 171 respectively (Figure 5B). As expected, the logistic regression performed at chance, since it only used the

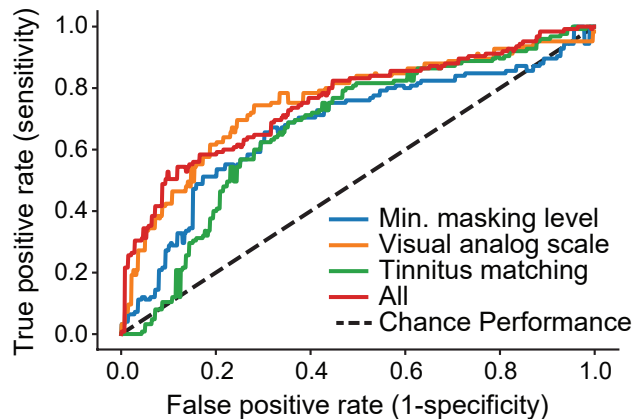

Figure 4: Receiver operator characteristic linear regression on tinnitus psychoacoustic task outcomes only. Combining the outcomes across MML, VAS, and Matching tasks achieved a 66% Accuracy and an AUC=0.75

172 outcome variable that had been normalized away on average. However, the other two methods show only a  
173 slight dip in performance, indicating that the manner in which the slider was adjusted, i.e., how malingerers  
174 subjects adjust the slider over time rather than the final psychoacoustic measurement value, can be used to  
175 discriminate the two populations.

### 176 3.4 Feature-based classification

177 Finally, we considered a feature-based approach that captured both the outcome variable and slider interac-  
178 tion across all three tasks (VAS, MML, Matching) while maintaining interpretability (as opposed to a Neural  
179 Network). ROC curves are shown on each task separately and combined in a single system (Figure 6A).  
180 The MML, VAS, and Matching tasks separately achieved AUCs of 0.68, 0.72, and 0.70 and accuracies of  
181 65%, 70%, 66%, respectively. The combined system performance additionally included other demographic  
182 information, such as age and sex, as well as the subjective tinnitus handicap inventory (THI) score. The  
183 combined system performance achieved 81% accuracy with an ROC of 0.88, outperforming any individual  
184 task.

185 Figure 6B illustrates a single decision tree from the random forest derived from features across all three  
186 tasks. In this example tree, the root node feature is the standard deviation across trials of the MML  
187 slider end point (MaskingSliderStdTrackEnd). Typically, the root node feature is best at separating the  
188 two populations, while other features further down in the tree are important but of decreasing use in the  
189 separation; in this example, these features include the VAS slider value, the subject age and THI. An  
190 advantage to this type of classifier is in its interpretability for medical diagnoses or financial decisions.

## 191 4 Discussion

192 This study aimed to distinguish participants with tinnitus from participants feigning tinnitus using their  
193 responses on several standard tinnitus characterization tests. Our results demonstrate that it is possible  
194 to discriminate individuals with tinnitus from malingerers with an accuracy of 81% using approximately 10  
195 minutes worth of reporting data. On average, tinnitus patients reported a higher MML relative to their  
196 audiometric threshold, and higher loudness on a visual analog scale and through tinnitus matching. By  
197 contrast to prior reports, we did not observe that malingerers matched their imagined tinnitus  
198 to higher physical sound levels than participants with tinnitus (Byun et al., 2010).

199 However, in this study we went beyond characterizing the group differences and extracted information  
200 about how the participant interacts with their tablet as opposed to only utilizing their psychoacoustic  
201 test results. Our analysis revealed that information about the populations is contained in both how they  
202 interacted with the slider as well as in the final slider value. This result has implications for many other

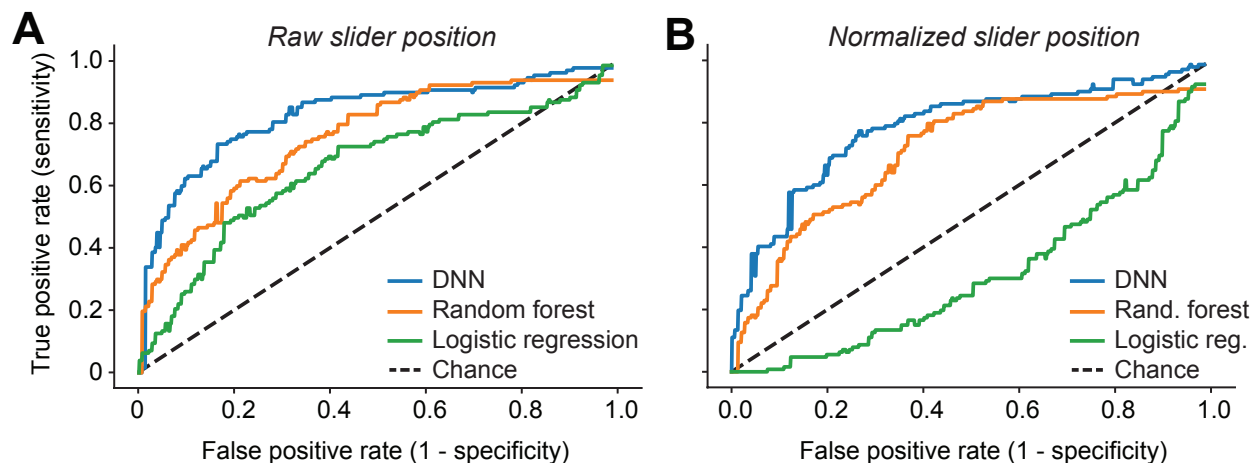

Figure 5: Patient vs malingering classifier performance using minimum masking level (MML) slider time-series data. Panel A uses the original time-series data with ROC AUC=0.84, 0.77, and 0.67 and accuracies of 77%, 65%, 49% accuracy respectively for a DNN, Random Forest, and Logistic Regression. Panel B ran the same classifiers on time-series data where the MML value is subtracted out for each participant with an ROC AUC=0.79, 0.72, and 0.31 and 77.4%, 65%, 49% accuracy respectively.

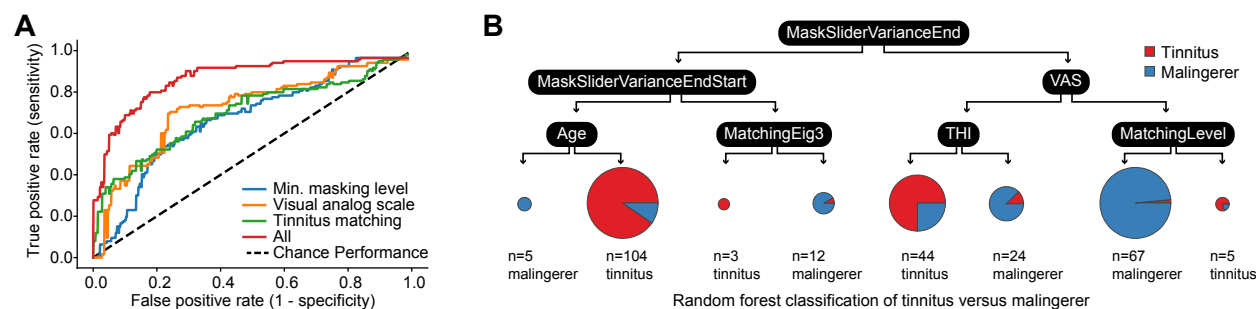

Figure 6: ROC for tinnitus versus malingering classification on three psychoacoustic tasks (blue, green, yellow), and combined for all tasks (red) using a random forest. Combined performance accuracy was 81% (AUC = 0.88).

203 fields of subjective or neuropsychiatric research (e.g. pain), where consumer-grade electronics are increasingly  
 204 being used (Yang et al., 2019; Chen et al., 2020; Henry, Roberts, et al., 2013).

205 Variation across trials within a session proved useful for classifying participants as patients or malingerers  
 206 (see Figure 6B). With chronic subjective tinnitus, the phantom sound percept is continuous but the per-  
 207 ceptual qualities (the loudness, pitch, etc.) can fluctuate over time (Chen et al., 2020). For this reason,  
 208 we included the natural heterogeneity within a participant by compiling measurements performed in five  
 209 separate test sessions across several weeks. Condensing the measurements into a single session would reduce  
 210 the variability within participants and presumably lead to even more accurate classification accuracy. This  
 211 prediction could be tested in future studies but, for the purposes of this study, our classification accuracy  
 212 and measurement time represents a conservative estimate.

213 On the individual trial level, patients feigning tinnitus took less time to mask their tinnitus and had  
 214 fewer reversals while matching their tinnitus. This result is in line with the expectation that it takes more  
 215 time to achieve a precise match or masking of actual tinnitus than of feigned tinnitus. However, we opted  
 216 to not include this as a feature in the classification and relied on a subset of the raw time-series data. The  
 217 primary reason for this is that the duration could be easily adapted and would not necessarily be a robust,  
 218 repeatable measure and more likely reflects participant engagement.

219 The study is limited in several ways. While the samples were matched in terms of age, they were relatively



220 small, and not controlled based on familiarity with using the tablet, the time of day, or audiometry. Also,  
221 the malingering participants in the current study were not financially motivated to feign tinnitus to the same  
222 extent as actual malingerers, whose financial remuneration could be larger but also condition upon making  
223 a credible claim. Because of the simplicity of the tests reported and the minimal amount of patient time  
224 required to conduct them, more robust classifiers could be developed on larger datasets through online testing.  
225 A larger study could also be validated against a true held-out dataset rather than rely on cross-validation.

## 226 5 Conclusion

227 Conventional subjective tinnitus assessments based on questionnaires cannot easily detect malingerers. In  
228 the broader context of tinnitus clinical research, questionnaire assessments tend to inflate placebo effects,  
229 underestimate treatment effects, and generally obscure the true prevalence and severity of tinnitus in the  
230 population. While objective biomarker measurements are the gold standard and the ultimate objective for  
231 tinnitus diagnostics, automatic and quantitative assessments of biobehavioral data represent an important  
232 intermediate step. Further to this point, as studies are progressively moving to online formats, these data  
233 can be scaled up to larger cohorts and subjected to similar forms of classification analyses described here.  
234 It seems likely that automated analyses of standardized rapid tinnitus tests would inform the decision as to  
235 whether to accept or deny claims of tinnitus disability. In this way, accurate identification of participants  
236 with tinnitus and differentiation from malingerers will also help funds be distributed where they are needed  
237 most and enable research on tinnitus severity.

## 238 6 Data Availability

239 The data are available from the corresponding author on reasonable request.

## 240 7 Competing Interests

241 The authors declare that there are no competing interests.

## 242 8 Author Contributions

243 C.S performed the data analysis, machine learning, and drafted the manuscript. E.H also contributed to the  
244 data analysis and writing of the manuscript draft. K.H wrote the real-time tablet software for data collection  
245 and storage. J.S. and K.J interacted with participants, and assisted with the study design. D.P. provided  
246 guidance in study design, analysis and writing. All authors reviewed the manuscript.

## 247 9 Acknowledgements

248 Address correspondence and reprint requests to Prof. Daniel Polley, 243 Charles Street, Boston, MA 02114;  
249 E-mail: [Daniel.polley@meei.harvard.edu](mailto:Daniel.polley@meei.harvard.edu)

250  
251 The authors would like to thank Michael Brandstein for his review of the classifier design and implementation.

252  
253 DISTRIBUTION STATEMENT A. Approved for public release. Distribution is unlimited.

254  
255 This material is based upon work supported by the United States Air Force under Air Force Contract  
256 No. FA8702-15-D-0001. Any opinions, findings, conclusions or recommendations expressed in this material  
257 are those of the author(s) and do not necessarily reflect the views of the United States Air Force.

258  
259 This work was supported by a research award from the Boston One Fund and NIDCD P50 DC015817.

## References

- 260
- 261 Basile, C.-É., Fournier, P., Hutchins, S., & Hébert, S. (2013). Psychoacoustic assessment to improve tinnitus  
262 diagnosis. *PLoS one*, *8*(12), e82995.
- 263 Bhatt, J. M., Lin, H. W., & Bhattacharyya, N. (2016). Prevalence, severity, exposures, and treatment  
264 patterns of tinnitus in the united states. *JAMA Otolaryngology–Head & Neck Surgery*, *142*(10), 959–965.
- 265 Byun, J. Y., Yeo, S. G., & Park, M. S. (2010). Reliability of repeated tinnitogram as malingering test.  
266 *Otolaryngology–Head and Neck Surgery*, *143*(2\_suppl), P246–P246.
- 267 Chen, J. X., Whitton, J. P., Parthasarathy, A., Hancock, K. E., & Polley, D. B. (2020). Fluctuations in  
268 subjective tinnitus ratings over time: Implications for clinical research. *Otology & Neurotology*, *41*(9),  
269 e1167–e1173.
- 270 Fawcett, T. (2006). An introduction to ROC analysis. *Pattern recognition letters*, *27*(8), 861–874.
- 271 Henry, J. A. (2016). “Measurement” of tinnitus. *Otology & Neurotology*, *37*(8), e276–e285.
- 272 Henry, J. A., McMillan, G. P., Thielman, E. J., Galvez, G., Zaugg, T. L., Porsov, E., & Silaski, G. (2013).  
273 Evaluating psychoacoustic measures for establishing presence of tinnitus. *Journal of Rehabilitation Re-  
274 search & Development*, *50*(4).
- 275 Henry, J. A., & Meikle, M. B. (2000). Psychoacoustic measures of tinnitus. *Journal of the American Academy  
276 of Audiology*, *11*(3).
- 277 Henry, J. A., Roberts, L. E., Ellingson, R. M., & Thielman, E. J. (2013). Computer-automated tinnitus  
278 assessment: noise-band matching, maskability, and residual inhibition. *Journal of the American Academy  
279 of Audiology*, *24*(6), 486–504.
- 280 Hiller, W., Goebel, G., & Rief, W. (1994). Reliability of self-rated tinnitus distress and association with  
281 psychological symptom patterns. *British Journal of Clinical Psychology*, *33*(2), 231–239.
- 282 Hoare, D. J., Edmondson-Jones, M., Gander, P. E., & Hall, D. A. (2014). Agreement and reliability of  
283 tinnitus loudness matching and pitch likeness rating. *PLoS one*, *9*(12), e114553.
- 284 Jerger, S., Jerger, J., & Lewis, S. (1981). Pediatric speech intelligibility test. ii. effect of receptive language  
285 age and chronological age. *International journal of pediatric Otorhinolaryngology*, *3*(2), 101–118.
- 286 Maes, I. H., Cima, R. F., Vlaeyen, J. W., Anteunis, L. J., & Joore, M. A. (2013). Tinnitus: a cost study.  
287 *Ear and hearing*, *34*(4), 508–514.
- 288 McMillan, G. P., Thielman, E. J., Wypych, K., & Henry, J. A. (2014). A bayesian perspective on tinnitus  
289 pitch matching. *Ear and hearing*, *35*(6), 687.
- 290 Pedregosa, F., Varoquaux, G., Gramfort, A., Michel, V., Thirion, B., Grisel, O., . . . Duchesnay, E. (2011).  
291 Scikit-learn: Machine learning in Python. *Journal of Machine Learning Research*, *12*, 2825–2830.
- 292 Steiger, J. R., Thielman, E. J., & Henry, J. A. (2013). Tinnitus loudness tracking: A “Type V Békésy”  
293 pattern does not exist for pseudotinnitus. *Journal of the American Academy of Audiology*, *24*(10), 920–  
294 926.
- 295 Yang, Y. S., Ryu, G. W., & Choi, M. (2019). Methodological strategies for ecological momentary assessment  
296 to evaluate mood and stress in adult patients using mobile phones: systematic review. *JMIR mHealth and  
297 uHealth*, *7*(4), e11215.
